# Supplementary material for: Hierarchical Ni–Co–O–C–P hollow tetragonal microtubes grown on Ni foam for efficient overall water splitting in alkaline media
Source: Royal Society of Chemistry journal article supplement (doi:10.1039/c9ra05165a), 2019-01-01
Supplement: c9ra05165a1.pdf [file c9ra05165a1.pdf]

## Supporting information for:

### Hierarchical Ni-Co-O-C-P hollow tetragonal microtubes grown on Ni foam for efficient overall water splitting in alkaline media

Wenjing Hu <sup>a, (#)</sup>, Qingqing Jiang <sup>a, (#), \*</sup>, Lin Wang <sup>a</sup>, Sha Hu <sup>a</sup>, Zhengxi Huang <sup>a</sup>, Tengfei Zhou <sup>a</sup>, Hai-jian Yang <sup>a</sup>, Juncheng Hu <sup>a, \*</sup>, Nanfang Tang <sup>b</sup>

<sup>a</sup>College of Chemistry & Materials Science, South-

Central University for Nationalities, Wuhan 430074, Hubei, China

<sup>b</sup>Dalian Institute of Chemical Physics, CAS, Chinese Academy of Sciences Dalian 116023, Liaoning, China

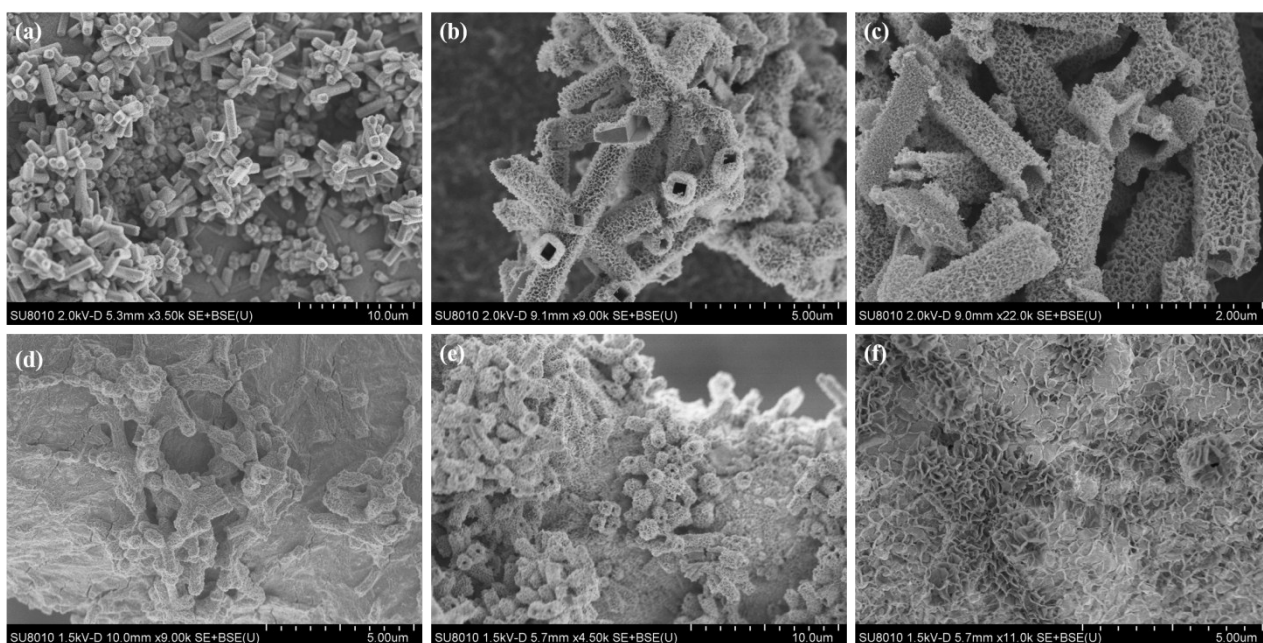

**Fig. S1.** SEM images of (a, b) NiCo<sub>2</sub>O<sub>4</sub> power, (c) NiCo<sub>2</sub>O<sub>4</sub> power after in-situ phosphorization process, (d) Ni-Co-O-C/NF with the increasing of carbon coating, (e) double the concentration of precursor, (f) Ni-Co-O-C-P/NF with the increasing of P content.

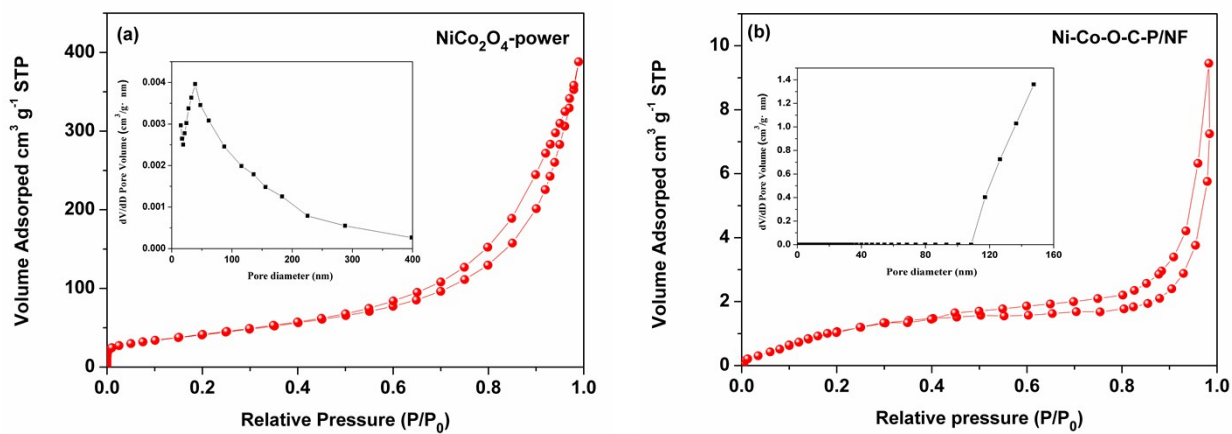

**Fig. S2.** N<sub>2</sub> adsorption-desorption isotherms and the corresponding pore size distribution of (a) NiCo<sub>2</sub>O<sub>4</sub> powder, (b) Ni-Co-O-C-P/NF.

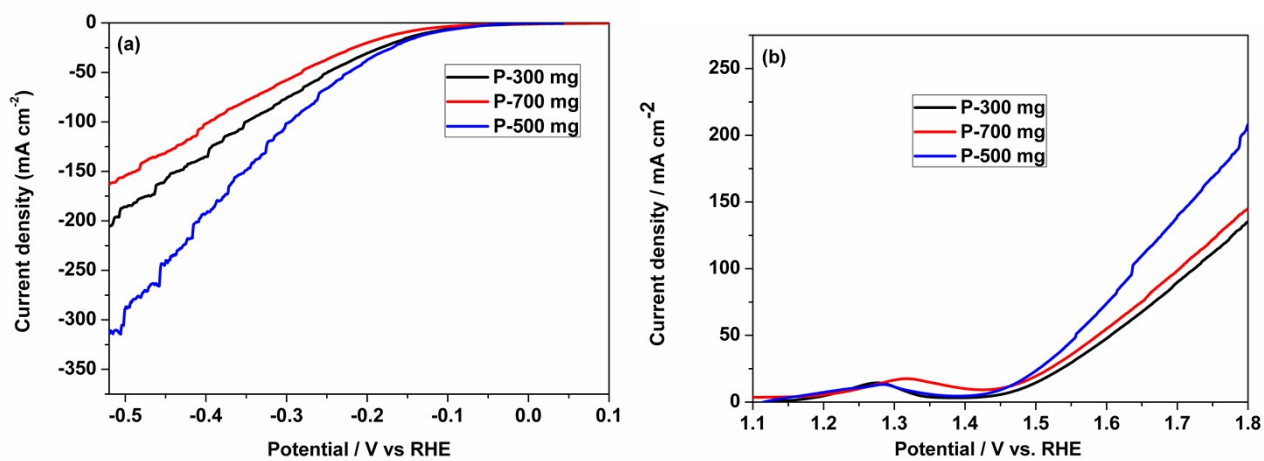

**Fig. S3.** Polarization curves of the hierarchical Ni-Co-O-C-P/NF with different P content for (a) HER and (b) OER.

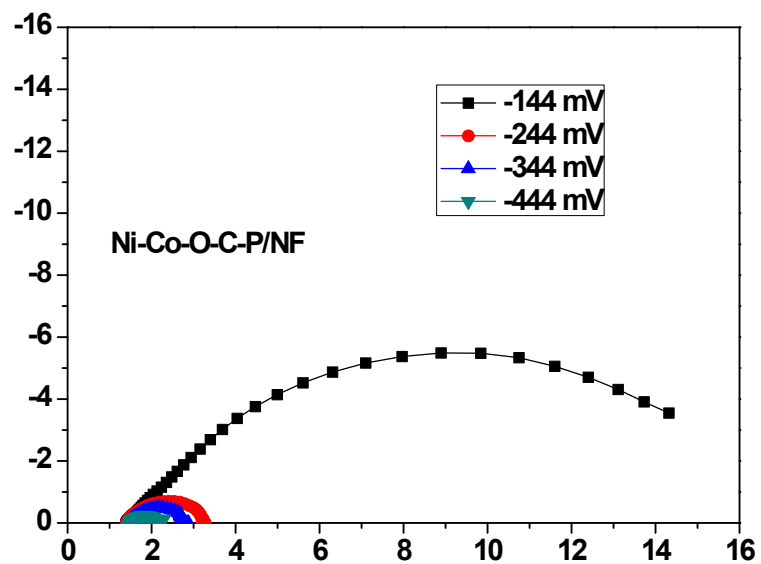

**Fig. S4.** Nyquist plots of the Ni-Co-O-C-P/NF measured under different potentials (mV vs. RHE) in the frequency range of  $10^5$  to 1 Hz.

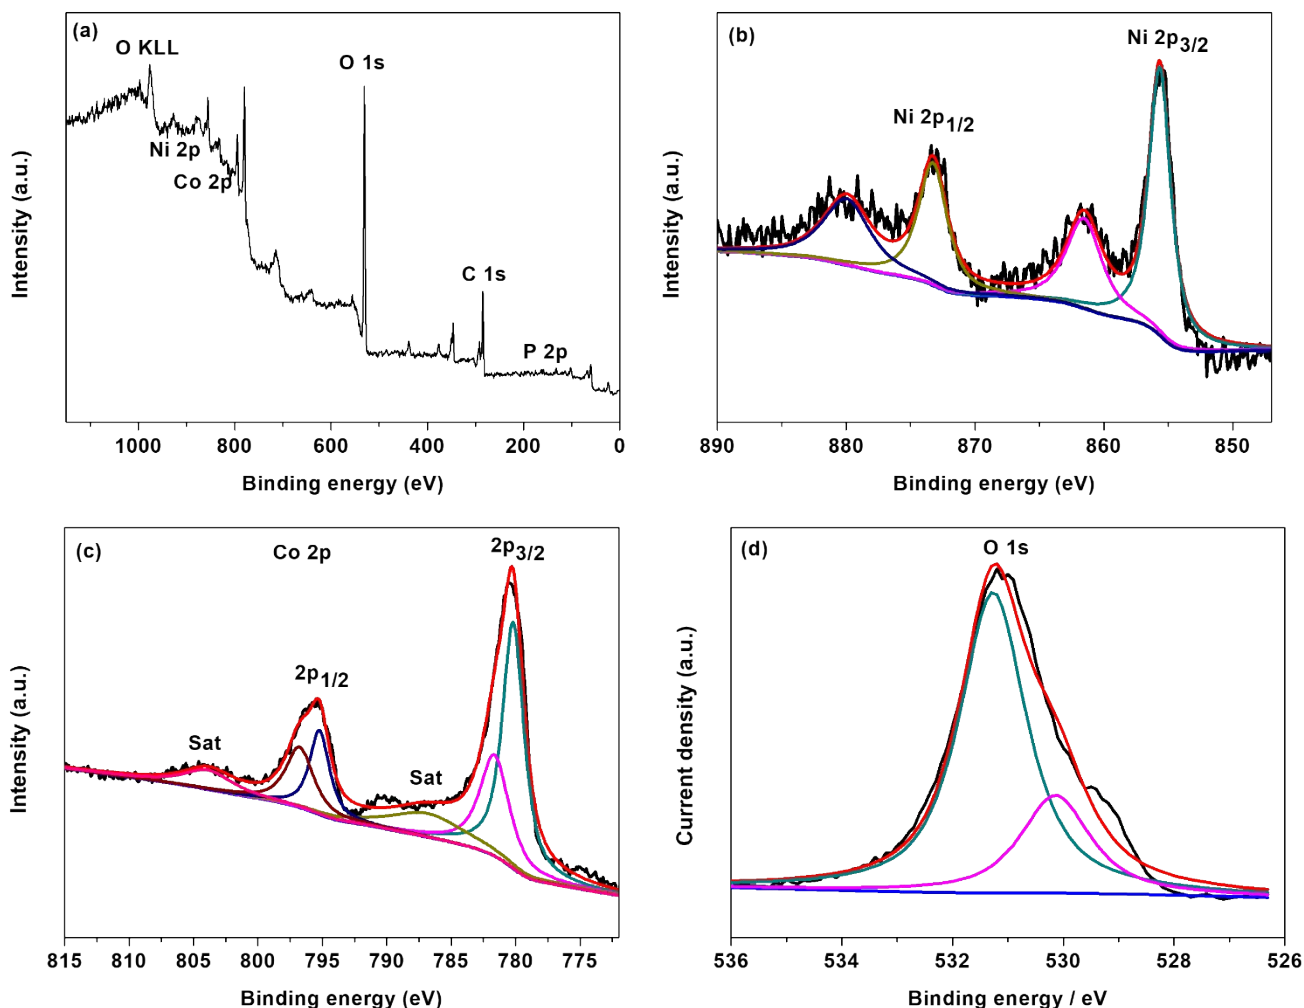

**Fig. S5:** The XPS spectrum of Ni-Co-O-C-P/NF after OER reaction. XPS spectra of (a) survey spectrum, (b) Ni 2p, (c) Co 2p and (d) O 1s.

As shown in Fig. S5, XPS analysis of Ni-Co-O-C-P/NF after OER reaction were given. The survey XPS spectrum confirms the presence of Ni, Co, O, C and P elements (Fig. S5a). For the Ni 2p region (Fig. S5b), the peaks at 855.6 eV and 873.1 eV along with two satellite peaks at 861.3 and 880.2 are attributed to Ni 2p<sub>3/2</sub> and Ni 2p<sub>1/2</sub> of the oxidized nickel species, respectively. For Co 2p spectrum (Fig. S5c), the peak at 781.8 eV in the Co 2p<sub>3/2</sub> region and 797.5 eV in the Co 2p<sub>1/2</sub> region are assigned to oxidized Co species (Co<sup>2+/3+</sup>). The peaks at 787.9 and 804.1 eV are according to the corresponding satellite peaks of Co 2p<sub>3/2</sub> and Co 2p<sub>1/2</sub>. For O 1s spectrum (Figure S5d), the peak at 531.4 eV is usually related to OH- groups, which indicates that the surface of the Ni-Co-O-C-P/NF is partially hydroxylated; and the characteristic peak located at 529.9 eV corresponds to Ni-Co-O.

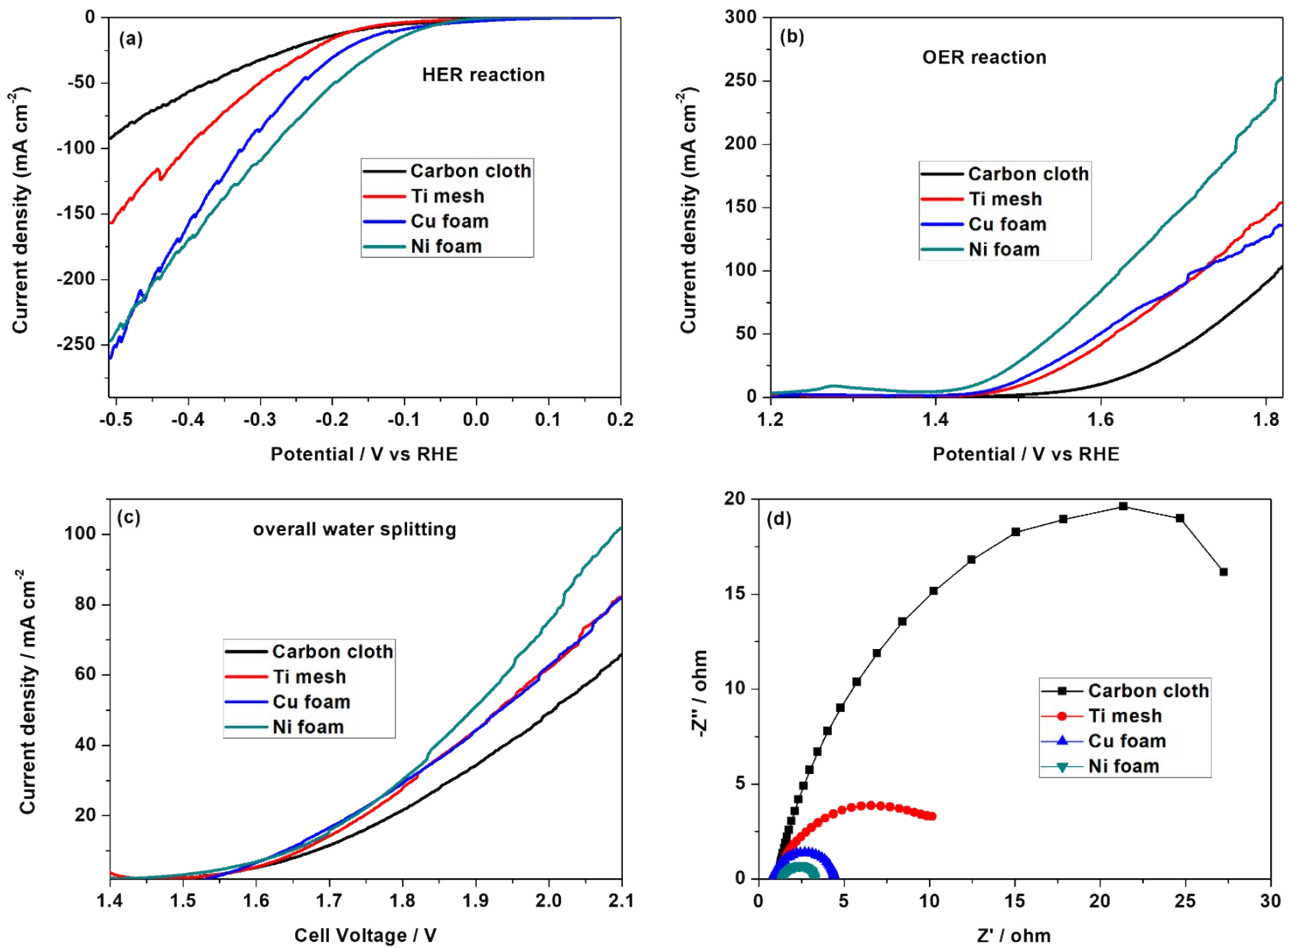

**Fig. S6.** *iR*-corrected polarization curve of the Ni-Co-O-C-P grown on different support for (a)HER, (b) OER, (c) overall water splitting reaction and (d) Nyquist plots of the Ni-Co-O-C-P grown on different support measured under -244 mV (vs. RHE) in the frequency range of 10<sup>5</sup> to 1 Hz.

The electrochemical reaction performance of Ni-Co-O-C-P grown on different supports are presented in Fig. S6. The Ni foam shows the best electrochemical activity for HER, OER and overall water splitting reaction, therefore, we chose Ni foam as the support. Fig. S6(d) shows the Nyquist plots of the Ni-Co-O-C-P grown on different support. The smaller diameter of the semicircle of the Ni-Co-O-C-P/NF suggests transfer impedance of contact and charge smaller than other samples. This may be one important reason for the different catalytic performance with different support.

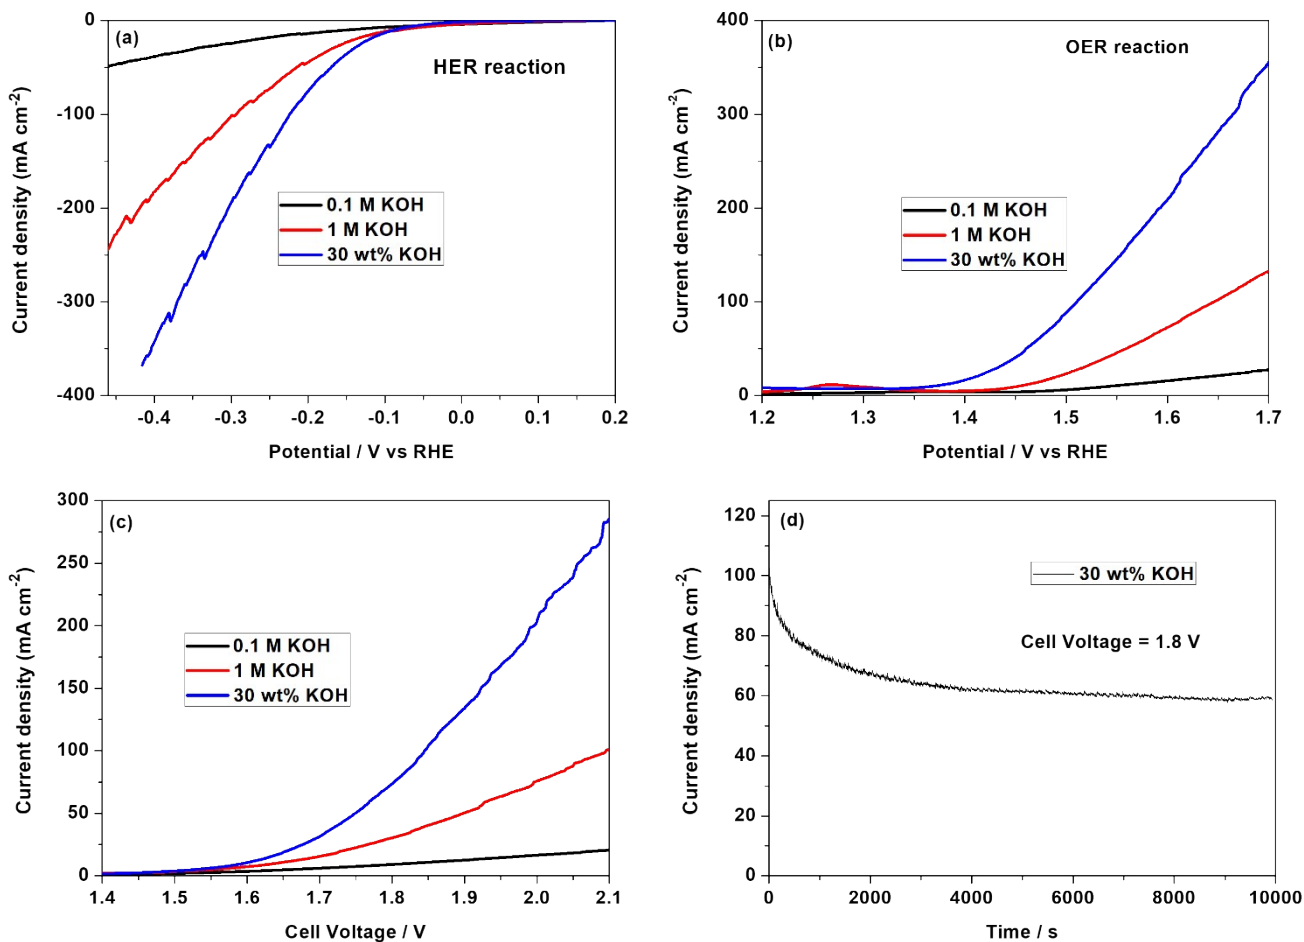

**Fig. S7.** The performance of Ni-Co-O-C-P/NF in 0.1 M and 30wt% KOH. iR-corrected polarization curve of the as prepared Ni-Co-O-C-P/NF for (a)HER, (b) OER and overall water splitting reaction; (d) the i-t curve of the hierarchical Ni-Co-O-C-P/NF for overall water splitting at a voltage of 1.80 V in 30 wt% KOH.

Table S1: Comparison of HER performance of NiCoP-based catalysts in 1.0 M KOH

| Catalysts                                                        | $\eta_{-10}$ (mV) | Tafel slope | Reference |
|------------------------------------------------------------------|-------------------|-------------|-----------|
| Ni-Co-O-C-P hollow tetragonal microtubes                         | -119              | 90          | This work |
| hierarchical Ni-Co-P hollow nanobricks                           | -107              | -           | 1         |
| CoNiP@NF                                                         | -155              | -           | 2         |
| Ni <sub>5</sub> P <sub>4</sub> @NiCo <sub>2</sub> O <sub>4</sub> | -27               | 27          | 3         |
| NiCo <sub>2</sub> P <sub>x</sub>                                 | -58               | 34          | 4         |
| CoP                                                              | -209              | 129         | 5         |
| CoP@NC                                                           | -78               | 49          | 6         |
| Ni <sub>2</sub> P/CNT                                            | -124              | 41          | 7         |



Table S2: Comparison of OER performance of NiCoP-based catalysts in 1.0 M KOH

| Catalysts                                | $\eta_{100}$ (mV) | Tafel slope (mV dec <sup>-1</sup> ) | Reference |
|------------------------------------------|-------------------|-------------------------------------|-----------|
| Ni-Co-O-C-P hollow tetragonal microtubes | 340               | 30                                  | This work |
| CoP                                      | 413               | 47                                  | 8         |
| CoP2/rGO                                 | 400               | 96                                  | 9         |
| NiCoP@NF                                 | 360               | 87                                  | 10        |
| NiCoP nanoparticle                       | 370               | 52                                  | 11        |
| hierarchical Ni-Co-P hollow nanobricks   | 320               | 76                                  | 1         |
| Ni <sub>2</sub> P nanoparticles          | 350               | -                                   | 12        |

Table S3: Comparison of overall water splitting performance of NiCoP-based catalysts in 1.0 M KOH

| Catalysts                                | $\eta_{10,\text{overall}}$ (mV) | $j_{1.7,\text{overall}}$ | Reference |
|------------------------------------------|---------------------------------|--------------------------|-----------|
| Ni-Co-O-C-P hollow tetragonal microtubes | 1.54                            | 23                       | This work |
| Ni <sub>2</sub> P                        | 1.63                            | 20                       | 12        |
| NiCoP                                    | 1.68                            | 16                       | 10        |
| NiS/NF                                   | 1.50                            | 500                      | 13        |
| hierarchical Ni-Co-P hollow nanobricks   | 1.62                            | 25                       | 1         |

## Reference

- [1] E. L. Hu, Y. F. Feng, J. W. Nai, D. Zhao, Y. Hu, X. W. Lou, *Energy Environ. Sci.*, **2018**, 11, 872-880.
- [2] A. L. Han, H. L. Chen, H. Y. Zhang, Z. J. Sun, P. W. Du, *J. Mater. Chem. A*, **2016**, 4, 10195-10202.
- [3] T. Zhang, K. N. Yang, C. Wang, S. Y. Li, L. Fu, *Adv. Energy Mater.* **2018**, 30, 1801690.
- [4] R. Zhang, X. X. Wang, S. J. Yu, T. Wen, X. N. Sun, X. K. Wang, W. P. Hu, *Adv. Mater.* **2017**, 29, 1605502.
- [5] J. Q. Tian, Q. Liu, A. M. Asiri, X. P. Sun, *J. Am. Chem. Soc.* **2014**, 136, 7587-7590.
- [6] F. L. Yang, Y. T. Chen, G. Z. Cheng, S. L. Chen, W. Luo, *ACS Catal.*, **2017**, 7, 3824-3831.
- [7] Y. Pan, W. H. Hu, D. P. Liu, Y. Q. Liu, C. G. Liu, *J. Mater. Chem. A*, **2015**, 3, 13087-13094.
- [8] N. Jiang, B. You, M. L. Sheng, Y. J. Sun, *Angew. Chem. Int. Ed.*, **2015**, 54, 6251-6254.
- [9] J. M. Wang, W. R. Yang, J. Q. Liu, *J. Mater. Chem. A*, **2016**, 4, 4686-4690.
- [10] H. F. Liang, A. N. Gandi, D. H. Anjum, X. B. Wang, H. N. Alshareef, *Nano Lett.*, **2016**, 16, 7718-7725.
- [11] C. D. Wang, J. Jiang, T. Ding, G. H. Chen, W. J. Xu, Q. Yang, *Adv. Mater. Interfaces* **2016**, 3, 1500454.
- [12] L. Stern, L. G. Feng, F. Song, X. L. Hu, *Energy Environ. Sci.*, **2015**, 8, 2347-2351.
- [13] J. T. Ren, Z. Y. Yuan, *ACS Sustainable Chem. Eng.* **2017**, 5, 7203-7210.
